# Supplementary material for: Droplet-based microfluidic analysis and screening of single plant cells
Source: PubMed Central journal article supplement (PMC5933695; doi:10.1371/journal.pone.0196810), 2018-05-03
Supplement: pone.0196810.s002.pdf [file pone.0196810.s002.pdf]

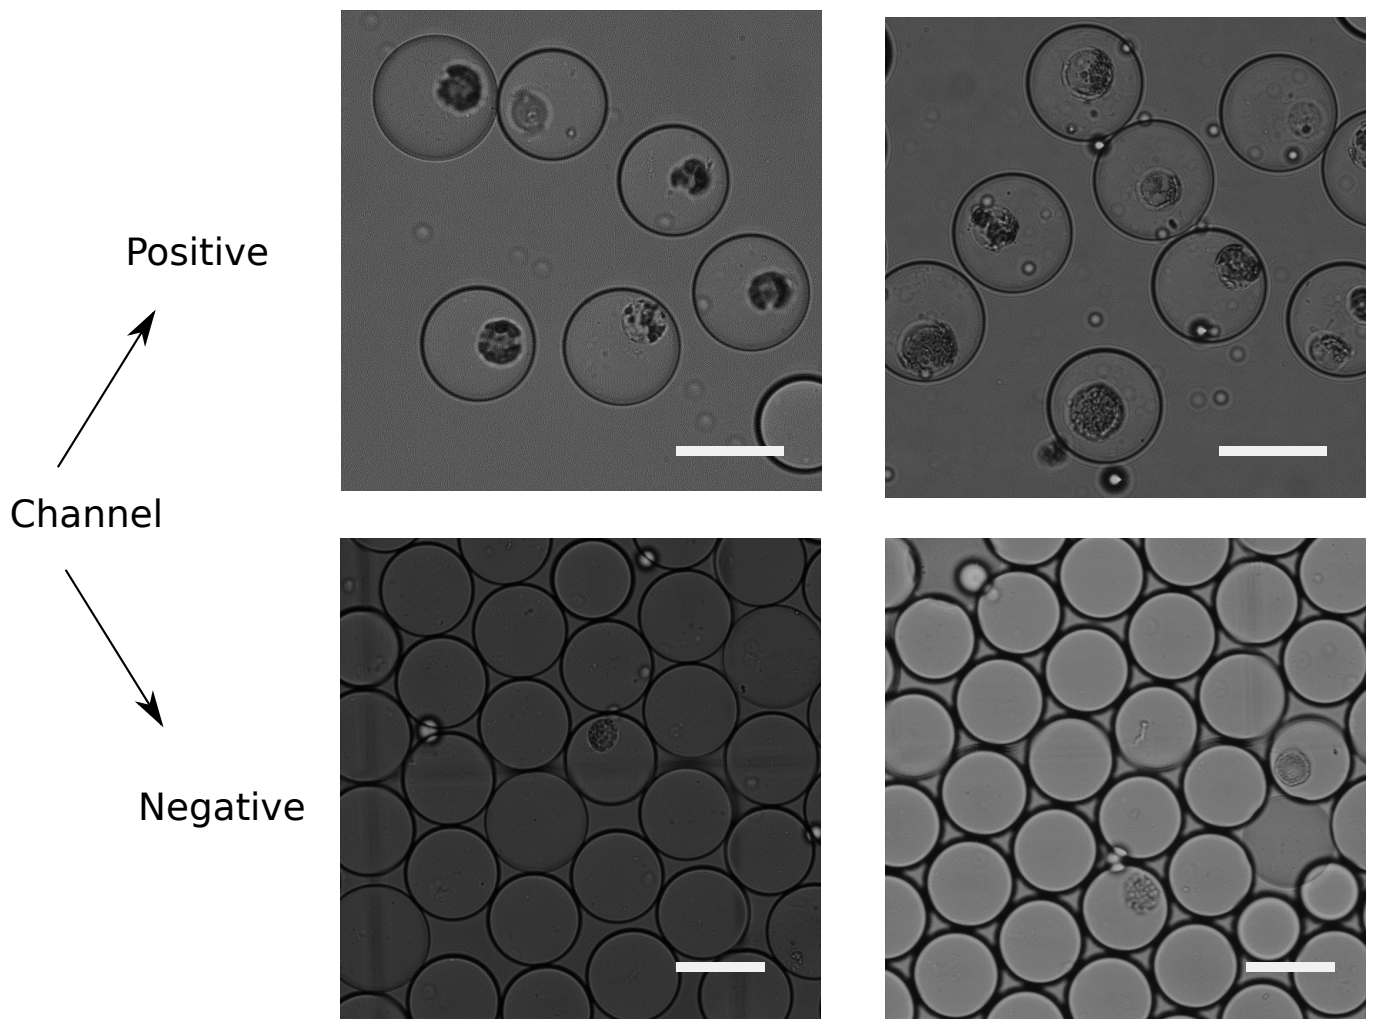

Figure S2
